# Supplementary material for: Development of Nanocoated Filaments for 3D Fused Deposition Modeling of Antibacterial and Antioxidant Materials
Source: MDPI journal article supplement (doi:10.3390/polym14132645), 2022-06-29
Supplement: s1 [file s1]

Supplementary materials

# Development of Nanocoated Filaments for 3D Fused Deposition Modeling of Antibacterial and Antioxidant Materials

Turdimuhammad Abdullah<sup>1</sup>, Rayyan O. Qurban<sup>2</sup>, Mohamed Sh. Abdel-Wahab<sup>1</sup>, Numan A. Salah<sup>1</sup>, Ammar AbdulGhani Melaibari<sup>1</sup>, Mazin A. Zamzami<sup>2</sup>, and Adnan Memic<sup>1,\*</sup>

<sup>1</sup> Center of Nanotechnology, King Abdul Aziz University, Jeddah 21589, Saudi Arabia;

1202908@gmail.com (T.A.); rayyanqurban@outlook.com (R.O.Q.); mshabaan90@yahoo.com (M.S.A.); nsalah@kau.edu.sa (N.A.S.); aamelabari@kau.edu.sa (A.A.M.); amemic@kau.edu.sa (A.M.);

<sup>2</sup> Department of Biochemistry, Faculty of Science, King Abdulaziz University, Jeddah, Saudi Arabia; mzamzami@kau.edu.sa (M.Z.)

<sup>3</sup> Department of Physics, Faculty of Science, King Abdulaziz University, Jeddah, Saudi Arabia

<sup>4</sup> Department of Medical Laboratory Technology, Faculty of Applied Medical Sciences, King Abdulaziz University, Jeddah, Saudi Arabia

<sup>5</sup> Department of Electrical and Computer Engineering, Faculty of Engineering, King Abdulaziz University, Jeddah, Saudi Arabia

\* Correspondence: amemic@kau.edu.sa

Received: date; Accepted: date; Published: date

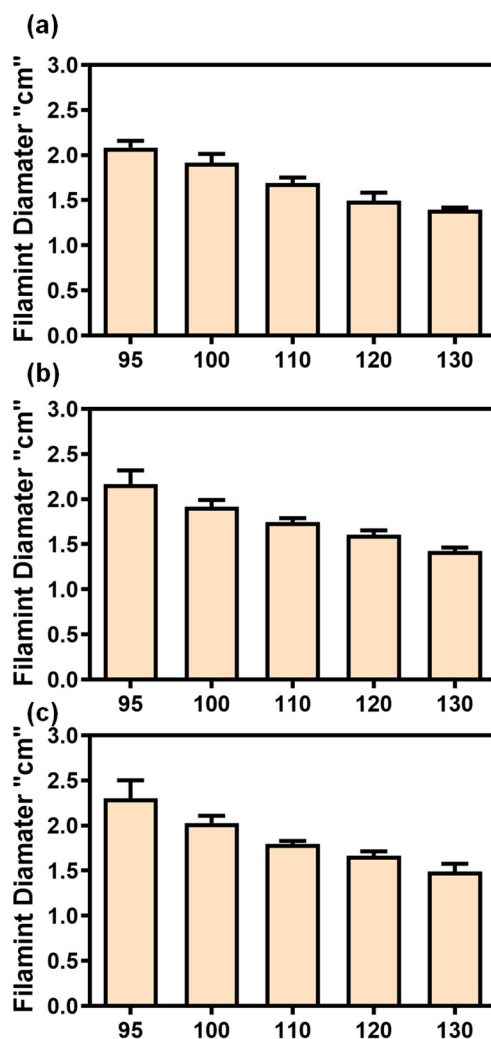

**Figure S1.** Fabrication of the 3D printing filament at different extrusion temperature and 5 kg/h (a), 4 kg/h (b), and 3 kg/h (c) of feed rate.

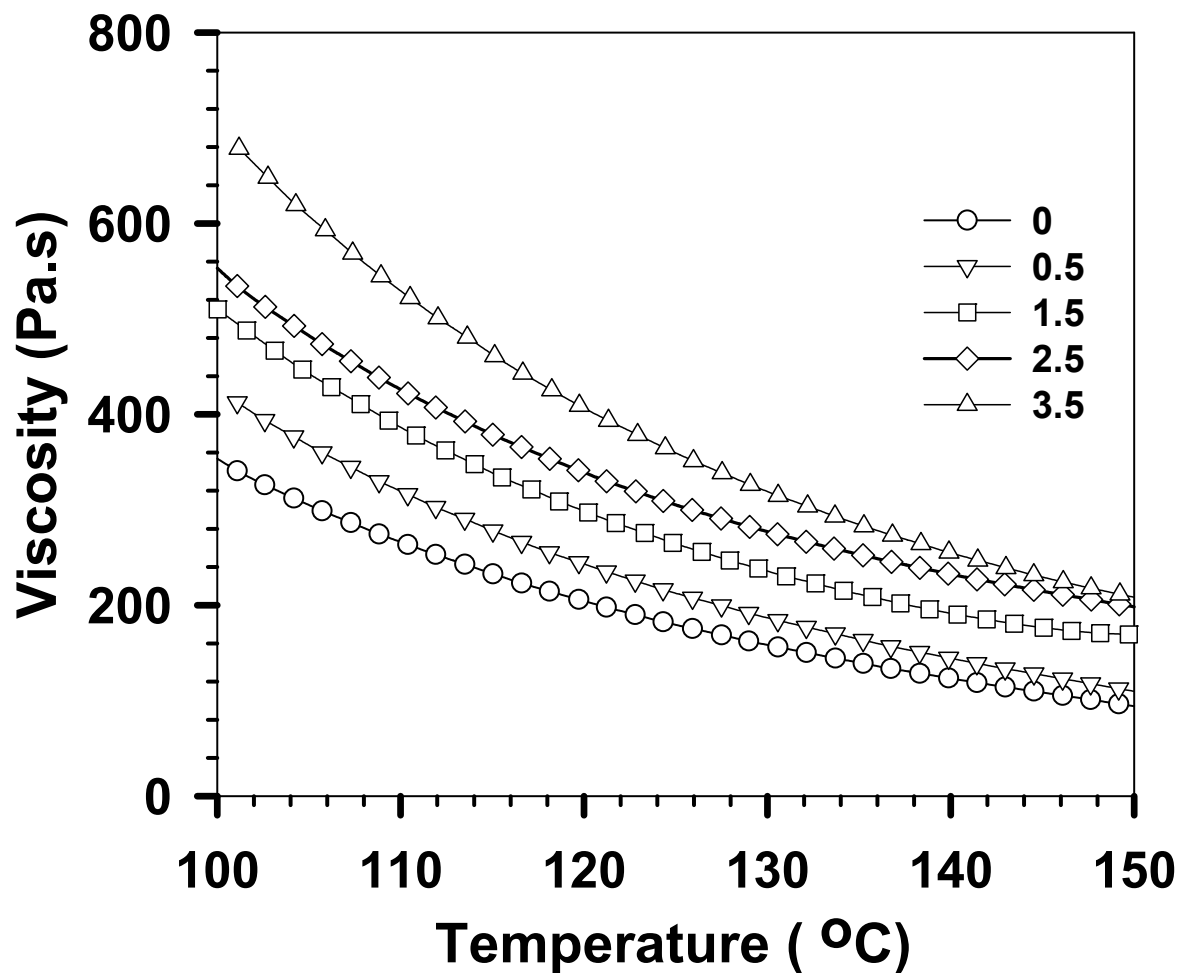

**Figure S2.** The temperature-dependent variation of complex viscosity of composite with different lignin mass fraction.

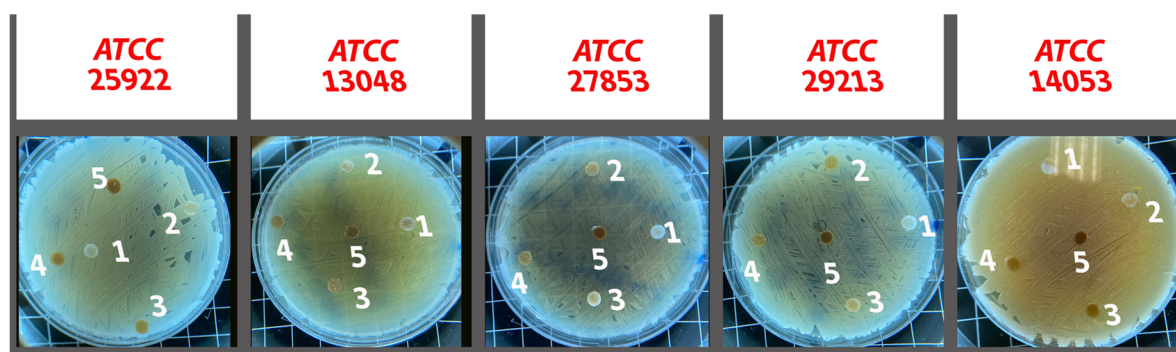

**Figure S3.** Representative inhibition zone of the non-coated composites against against 5 different microorganism.

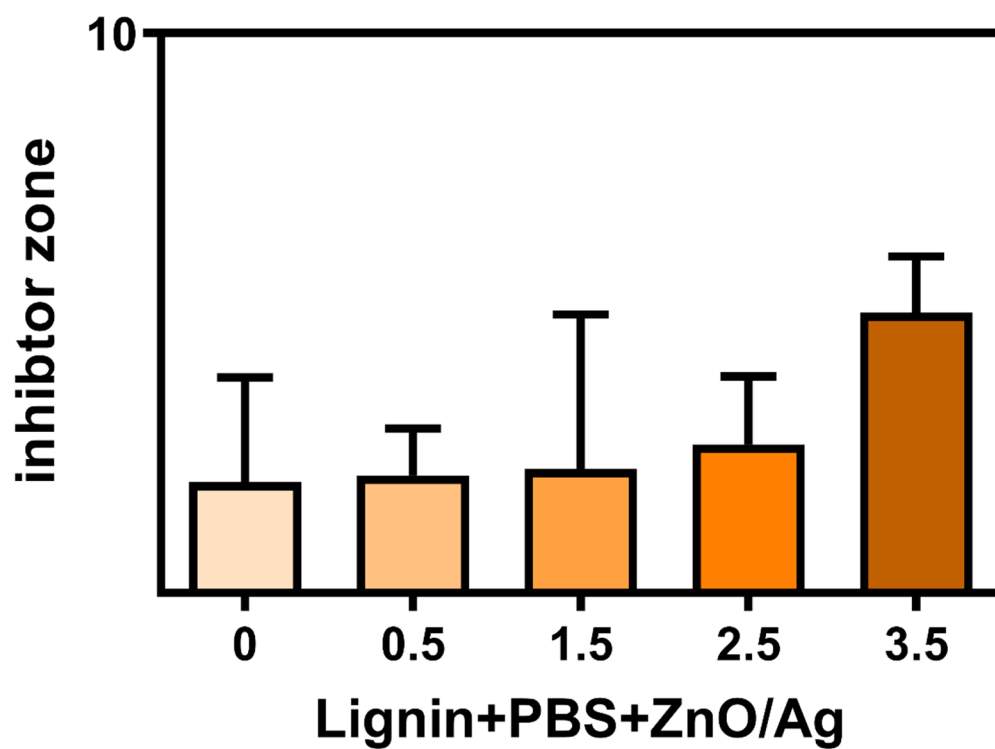

**Figure S4.** Inhibition zone of the composites with different mass fractions of lignin coated by Ag/ZnO against *Escherichia Coli*. There is no significant difference in the data

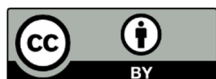

© 2022 by the authors. Submitted for possible open access publication under the terms and conditions of the Creative Commons Attribution (CC BY) license (<http://creativecommons.org/licenses/by/4.0/>).
